# Supplementary material
Source: publisher figshare collection journal article supplement (https://acs.figshare.com/ndownloader/files/4272206)
Supplement: Supplementary file 1 [file 4272206]

  
data_cwc1132 
  
_audit_creation_method            SHELXL-97 
_chemical_name_systematic 
; 
 ? 
; 
_chemical_name_common             ? 
_chemical_melting_point           ? 
_chemical_formula_moiety          ? 
_chemical_formula_sum 
 'C56 H47 Ir N4 O2' 
_chemical_formula_weight          1000.18 
  
loop_ 
 _atom_type_symbol 
 _atom_type_description 
 _atom_type_scat_dispersion_real 
 _atom_type_scat_dispersion_imag 
 _atom_type_scat_source 
 'C'  'C'   0.0033   0.0016 
 'International Tables Vol C Tables 4.2.6.8 and 6.1.1.4' 
 'H'  'H'   0.0000   0.0000 
 'International Tables Vol C Tables 4.2.6.8 and 6.1.1.4' 
 'N'  'N'   0.0061   0.0033 
 'International Tables Vol C Tables 4.2.6.8 and 6.1.1.4' 
 'O'  'O'   0.0106   0.0060 
 'International Tables Vol C Tables 4.2.6.8 and 6.1.1.4' 
 'Ir'  'Ir'  -1.4442   7.9887 
 'International Tables Vol C Tables 4.2.6.8 and 6.1.1.4' 
  
_symmetry_cell_setting            Tetragonal 
_symmetry_space_group_name_H-M    I4(1) 
  
loop_ 
 _symmetry_equiv_pos_as_xyz 
 'x, y, z' 
 '-x+1/2, -y+1/2, z+1/2' 
 '-y, x+1/2, z+1/4' 
 'y+1/2, -x, z+3/4' 
 'x+1/2, y+1/2, z+1/2' 
 '-x+1, -y+1, z+1' 
 '-y+1/2, x+1, z+3/4' 
 'y+1, -x+1/2, z+5/4' 
  
_cell_length_a                    19.2067(10) 
_cell_length_b                    19.2067(10) 
_cell_length_c                    25.478(3) 
_cell_angle_alpha                 90.00 
_cell_angle_beta                  90.00 
_cell_angle_gamma                 90.00 
_cell_volume                      9398.8(12) 
_cell_formula_units_Z             8 
_cell_measurement_temperature     293(2) 
_cell_measurement_reflns_used     949 
_cell_measurement_theta_min       2.62 
_cell_measurement_theta_max       26.90 
  
_exptl_crystal_description        block 
_exptl_crystal_colour             red 
_exptl_crystal_size_max           0.50 
_exptl_crystal_size_mid           0.40 
_exptl_crystal_size_min           0.30 
_exptl_crystal_density_meas       0 
_exptl_crystal_density_diffrn     1.414 
_exptl_crystal_density_method     'not measured' 
_exptl_crystal_F_000              4032 
_exptl_absorpt_coefficient_mu     2.887 
_exptl_absorpt_correction_type    SADABS 
_exptl_absorpt_correction_T_min   0.697453 
_exptl_absorpt_correction_T_max   1.0000 
_exptl_absorpt_process_details    ? 
  
_exptl_special_details 
; 
 ? 
; 
  
_diffrn_ambient_temperature       293(2) 
_diffrn_radiation_wavelength      0.71073 
_diffrn_radiation_type            MoK\a 
_diffrn_radiation_source          'fine-focus sealed tube' 
_diffrn_radiation_monochromator   graphite 
_diffrn_measurement_device_type   'BRUKER SMART CCD DIFFRACTOMETER' 
_diffrn_measurement_method        'OMEGA SCAN' 
_diffrn_detector_area_resol_mean  ? 
_diffrn_standards_number          ? 
_diffrn_standards_interval_count  ? 
_diffrn_standards_interval_time   ? 
_diffrn_standards_decay_%         ? 
_diffrn_reflns_number             31882 
_diffrn_reflns_av_R_equivalents   0.0350 
_diffrn_reflns_av_sigmaI/netI     0.0502 
_diffrn_reflns_limit_h_min        -20 
_diffrn_reflns_limit_h_max        25 
_diffrn_reflns_limit_k_min        -25 
_diffrn_reflns_limit_k_max        25 
_diffrn_reflns_limit_l_min        -28 
_diffrn_reflns_limit_l_max        33 
_diffrn_reflns_theta_min          1.33 
_diffrn_reflns_theta_max          28.03 
_reflns_number_total              10629 
_reflns_number_gt                 9145 
_reflns_threshold_expression      >2sigma(I) 
  
_computing_data_collection        'BRUKER SMART CCD DIFFRACTOMETER' 
_computing_cell_refinement        'BRUKER SMART CCD DIFFRACTOMETER' 
_computing_data_reduction         'BRUKER SMART CCD DIFFRACTOMETER' 
_computing_structure_solution     'SHELXS-97 (Sheldrick, 1990)' 
_computing_structure_refinement   'SHELXL-97 (Sheldrick, 1997)' 
_computing_molecular_graphics     'SIEMENS SHELXTL' 
_computing_publication_material   'SIEMENS SHELXTL' 
  
_refine_special_details 
; 
 Refinement of F^2^ against ALL reflections.  The weighted R-factor wR and 
 goodness of fit S are based on F^2^, conventional R-factors R are based 
 on F, with F set to zero for negative F^2^. The threshold expression of 
 F^2^ > 2sigma(F^2^) is used only for calculating R-factors(gt) etc. and is 
 not relevant to the choice of reflections for refinement.  R-factors based 
 on F^2^ are statistically about twice as large as those based on F, and R- 
 factors based on ALL data will be even larger. 
; 
  
_refine_ls_structure_factor_coef  Fsqd 
_refine_ls_matrix_type            full 
_refine_ls_weighting_scheme       calc 
_refine_ls_weighting_details 
 'calc w=1/[\s^2^(Fo^2^)+(0.0266P)^2^+0.3443P] where P=(Fo^2^+2Fc^2^)/3' 
_atom_sites_solution_primary      direct 
_atom_sites_solution_secondary    difmap 
_atom_sites_solution_hydrogens    geom 
_refine_ls_hydrogen_treatment     riding 
_refine_ls_extinction_method      none 
_refine_ls_extinction_coef        ? 
_refine_ls_abs_structure_details 
 'Flack H D (1983), Acta Cryst. A39, 876-881' 
_refine_ls_abs_structure_Flack    0.019(5) 
_refine_ls_number_reflns          10629 
_refine_ls_number_parameters      568 
_refine_ls_number_restraints      1 
_refine_ls_R_factor_all           0.0409 
_refine_ls_R_factor_gt            0.0288 
_refine_ls_wR_factor_ref          0.0655 
_refine_ls_wR_factor_gt           0.0603 
_refine_ls_goodness_of_fit_ref    1.044 
_refine_ls_restrained_S_all       1.044 
_refine_ls_shift/su_max           0.004 
_refine_ls_shift/su_mean          0.000 
  
loop_ 
 _atom_site_label 
 _atom_site_type_symbol 
 _atom_site_fract_x 
 _atom_site_fract_y 
 _atom_site_fract_z 
 _atom_site_U_iso_or_equiv 
 _atom_site_adp_type 
 _atom_site_occupancy 
 _atom_site_symmetry_multiplicity 
 _atom_site_calc_flag 
 _atom_site_refinement_flags 
 _atom_site_disorder_assembly 
 _atom_site_disorder_group 
Ir1 Ir 0.265282(8) 0.501909(6) 0.113060(14) 0.03318(4) Uani 1 1 d . . . 
N1 N 0.25651(18) 0.59580(16) 0.07737(13) 0.0360(7) Uani 1 1 d . . . 
N2 N 0.32322(18) 0.46584(18) 0.05217(13) 0.0382(8) Uani 1 1 d . . . 
N3 N 0.27814(19) 0.40985(17) 0.15104(13) 0.0379(8) Uani 1 1 d . . . 
N4 N 0.21253(19) 0.53989(18) 0.17652(12) 0.0386(8) Uani 1 1 d . . . 
C1 C 0.2189(2) 0.6522(2) 0.09522(16) 0.0380(10) Uani 1 1 d . . . 
C2 C 0.2230(2) 0.7062(2) 0.05574(18) 0.0456(10) Uani 1 1 d . . . 
H2A H 0.2018 0.7496 0.0576 0.055 Uiso 1 1 calc R . . 
C3 C 0.2625(3) 0.6831(2) 0.01623(17) 0.0477(11) Uani 1 1 d . . . 
H3A H 0.2741 0.7078 -0.0139 0.057 Uiso 1 1 calc R . . 
C4 C 0.2836(2) 0.6138(2) 0.02869(16) 0.0386(9) Uani 1 1 d . . . 
C5 C 0.3242(2) 0.5712(2) -0.00330(16) 0.0420(10) Uani 1 1 d . . . 
C6 C 0.3414(2) 0.5021(2) 0.00783(16) 0.0416(10) Uani 1 1 d . . . 
C7 C 0.3779(3) 0.4562(3) -0.02764(18) 0.0543(12) Uani 1 1 d . . . 
H7A H 0.3956 0.4678 -0.0605 0.065 Uiso 1 1 calc R . . 
C8 C 0.3813(3) 0.3936(3) -0.00433(19) 0.0535(12) Uani 1 1 d . . . 
H8A H 0.4016 0.3537 -0.0183 0.064 Uiso 1 1 calc R . . 
C9 C 0.3479(2) 0.3991(2) 0.04633(17) 0.0405(9) Uani 1 1 d . . . 
C10 C 0.3433(2) 0.3461(2) 0.08302(19) 0.0431(11) Uani 1 1 d . . . 
C11 C 0.3119(3) 0.3521(2) 0.13182(17) 0.0413(11) Uani 1 1 d . . . 
C12 C 0.3095(3) 0.2981(2) 0.17108(19) 0.0508(12) Uani 1 1 d . . . 
H12A H 0.3296 0.2541 0.1684 0.061 Uiso 1 1 calc R . . 
C13 C 0.2735(3) 0.3223(2) 0.21184(17) 0.0509(12) Uani 1 1 d . . . 
H13A H 0.2632 0.2980 0.2424 0.061 Uiso 1 1 calc R . . 
C14 C 0.2535(2) 0.3929(2) 0.20012(16) 0.0417(10) Uani 1 1 d . . . 
C15 C 0.2161(2) 0.4363(2) 0.23305(16) 0.0440(10) Uani 1 1 d . . . 
C16 C 0.1990(3) 0.5056(2) 0.22257(16) 0.0424(10) Uani 1 1 d . . . 
C17 C 0.1624(3) 0.5517(2) 0.25712(18) 0.0545(12) Uani 1 1 d . . . 
H17A H 0.1476 0.5413 0.2910 0.065 Uiso 1 1 calc R . . 
C18 C 0.1534(3) 0.6123(3) 0.23223(17) 0.0515(12) Uani 1 1 d . . . 
H18A H 0.1311 0.6515 0.2456 0.062 Uiso 1 1 calc R . . 
C19 C 0.1842(2) 0.6059(2) 0.18114(16) 0.0373(9) Uani 1 1 d . . . 
C20 C 0.1857(2) 0.6579(2) 0.14301(17) 0.0390(10) Uani 1 1 d . . . 
C21 C 0.3523(3) 0.6026(2) -0.05281(17) 0.0460(11) Uani 1 1 d . . . 
C22 C 0.4201(3) 0.6219(4) -0.0570(2) 0.0788(19) Uani 1 1 d . . . 
H22A H 0.4502 0.6137 -0.0290 0.095 Uiso 1 1 calc R . . 
C23 C 0.4456(4) 0.6535(4) -0.1020(3) 0.094(2) Uani 1 1 d . . . 
H23A H 0.4925 0.6651 -0.1039 0.112 Uiso 1 1 calc R . . 
C24 C 0.4036(4) 0.6678(3) -0.1433(3) 0.0763(18) Uani 1 1 d . . . 
C25 C 0.3362(3) 0.6462(3) -0.1403(2) 0.0708(15) Uani 1 1 d . . . 
H25A H 0.3071 0.6535 -0.1689 0.085 Uiso 1 1 calc R . . 
C26 C 0.3094(3) 0.6136(3) -0.0958(2) 0.0584(13) Uani 1 1 d . . . 
H26A H 0.2631 0.5994 -0.0950 0.070 Uiso 1 1 calc R . . 
C27 C 0.4297(5) 0.7050(4) -0.1924(3) 0.126(4) Uani 1 1 d . . . 
H27A H 0.4779 0.7168 -0.1880 0.189 Uiso 1 1 calc R . . 
H27B H 0.4031 0.7467 -0.1978 0.189 Uiso 1 1 calc R . . 
H27C H 0.4246 0.6749 -0.2222 0.189 Uiso 1 1 calc R . . 
C31 C 0.3748(3) 0.2768(3) 0.07026(19) 0.0509(12) Uani 1 1 d . . . 
C32 C 0.3339(3) 0.2183(3) 0.0667(2) 0.0609(14) Uani 1 1 d . . . 
H32A H 0.2857 0.2224 0.0687 0.073 Uiso 1 1 calc R . . 
C33 C 0.3632(5) 0.1545(3) 0.0601(3) 0.087(2) Uani 1 1 d . . . 
H33A H 0.3347 0.1154 0.0585 0.104 Uiso 1 1 calc R . . 
C34 C 0.4343(5) 0.1466(4) 0.0557(3) 0.095(3) Uani 1 1 d . . . 
C35 C 0.4751(4) 0.2059(5) 0.0563(3) 0.098(2) Uani 1 1 d . . . 
H35A H 0.5229 0.2026 0.0509 0.117 Uiso 1 1 calc R . . 
C36 C 0.4452(3) 0.2697(3) 0.0648(2) 0.0721(17) Uani 1 1 d . . . 
H36A H 0.4734 0.3090 0.0668 0.087 Uiso 1 1 calc R . . 
C37 C 0.4687(5) 0.0753(4) 0.0509(4) 0.157(5) Uani 1 1 d . . . 
H37A H 0.4337 0.0397 0.0517 0.235 Uiso 1 1 calc R . . 
H37B H 0.5004 0.0686 0.0796 0.235 Uiso 1 1 calc R . . 
H37C H 0.4938 0.0728 0.0183 0.235 Uiso 1 1 calc R . . 
C41 C 0.1891(3) 0.4044(2) 0.28351(17) 0.0500(12) Uani 1 1 d . . . 
C42 C 0.1197(3) 0.3903(3) 0.2887(2) 0.0749(17) Uani 1 1 d . . . 
H42A H 0.0887 0.4036 0.2624 0.090 Uiso 1 1 calc R . . 
C43 C 0.0952(4) 0.3562(4) 0.3332(3) 0.095(2) Uani 1 1 d . . . 
H43A H 0.0479 0.3468 0.3361 0.114 Uiso 1 1 calc R . . 
C44 C 0.1391(5) 0.3361(3) 0.3729(3) 0.086(2) Uani 1 1 d . . . 
C45 C 0.2077(4) 0.3526(3) 0.3682(2) 0.0752(17) Uani 1 1 d . . . 
H45A H 0.2380 0.3415 0.3954 0.090 Uiso 1 1 calc R . . 
C46 C 0.2337(3) 0.3856(3) 0.32360(19) 0.0592(14) Uani 1 1 d . . . 
H46A H 0.2811 0.3951 0.3208 0.071 Uiso 1 1 calc R . . 
C47 C 0.1123(6) 0.2974(5) 0.4206(3) 0.140(4) Uani 1 1 d . . . 
H47A H 0.0630 0.2903 0.4173 0.210 Uiso 1 1 calc R . . 
H47B H 0.1217 0.3242 0.4516 0.210 Uiso 1 1 calc R . . 
H47C H 0.1353 0.2531 0.4232 0.210 Uiso 1 1 calc R . . 
C51 C 0.1466(2) 0.7239(2) 0.15361(16) 0.0390(9) Uani 1 1 d . . . 
C52 C 0.1811(3) 0.7874(2) 0.15605(18) 0.0479(11) Uani 1 1 d . . . 
H52A H 0.2295 0.7885 0.1545 0.057 Uiso 1 1 calc R . . 
C53 C 0.1443(4) 0.8489(3) 0.1608(2) 0.0687(15) Uani 1 1 d . . . 
H53A H 0.1683 0.8910 0.1618 0.082 Uiso 1 1 calc R . . 
C54 C 0.0728(4) 0.8493(3) 0.1640(2) 0.0715(17) Uani 1 1 d . . . 
C55 C 0.0399(3) 0.7867(4) 0.1634(2) 0.0739(18) Uani 1 1 d . . . 
H55A H -0.0084 0.7858 0.1663 0.089 Uiso 1 1 calc R . . 
C56 C 0.0751(3) 0.7246(3) 0.1586(2) 0.0565(13) Uani 1 1 d . . . 
H56A H 0.0506 0.6828 0.1588 0.068 Uiso 1 1 calc R . . 
C57 C 0.0325(5) 0.9169(4) 0.1668(3) 0.126(3) Uani 1 1 d . . . 
H57A H -0.0165 0.9070 0.1682 0.189 Uiso 1 1 calc R . . 
H57B H 0.0424 0.9444 0.1363 0.189 Uiso 1 1 calc R . . 
H57C H 0.0460 0.9421 0.1977 0.189 Uiso 1 1 calc R . . 
C61 C 0.1764(2) 0.4680(2) 0.07898(16) 0.0361(9) Uani 1 1 d . . . 
C62 C 0.1696(2) 0.4649(2) 0.02418(17) 0.0465(11) Uani 1 1 d . . . 
H62A H 0.2064 0.4796 0.0032 0.056 Uiso 1 1 calc R . . 
C63 C 0.1086(3) 0.4401(3) 0.00037(17) 0.0489(11) Uani 1 1 d . . . 
H63A H 0.1060 0.4374 -0.0360 0.059 Uiso 1 1 calc R . . 
C64 C 0.0531(2) 0.4200(2) 0.03020(17) 0.0437(10) Uani 1 1 d . . . 
C65 C 0.0578(3) 0.4225(3) 0.08420(19) 0.0540(12) Uani 1 1 d . . . 
H65A H 0.0205 0.4084 0.1049 0.065 Uiso 1 1 calc R . . 
C66 C 0.1192(2) 0.4463(2) 0.10765(19) 0.0470(10) Uani 1 1 d . . . 
H66A H 0.1216 0.4476 0.1441 0.056 Uiso 1 1 calc R . . 
C67 C -0.0619(3) 0.3715(3) 0.0338(2) 0.0699(16) Uani 1 1 d . . . 
H67A H -0.0986 0.3565 0.0108 0.105 Uiso 1 1 calc R . . 
H67B H -0.0786 0.4084 0.0559 0.105 Uiso 1 1 calc R . . 
H67C H -0.0470 0.3331 0.0552 0.105 Uiso 1 1 calc R . . 
C71 C 0.4099(7) 0.5866(8) 0.1358(4) 0.305(12) Uani 1 1 d . . . 
H71A H 0.4505 0.5880 0.1577 0.458 Uiso 1 1 calc R . . 
H71B H 0.3865 0.6307 0.1372 0.458 Uiso 1 1 calc R . . 
H71C H 0.4235 0.5769 0.1003 0.458 Uiso 1 1 calc R . . 
O1 O -0.00452(18) 0.3961(2) 0.00319(13) 0.0615(9) Uani 1 1 d . . . 
O2 O 0.36798(18) 0.53789(18) 0.15233(13) 0.0569(9) Uani 1 1 d . . . 
H2 H 0.3560 0.5135 0.1275 0.085 Uiso 1 1 calc R . . 
  
loop_ 
 _atom_site_aniso_label 
 _atom_site_aniso_U_11 
 _atom_site_aniso_U_22 
 _atom_site_aniso_U_33 
 _atom_site_aniso_U_23 
 _atom_site_aniso_U_13 
 _atom_site_aniso_U_12 
Ir1 0.04436(9) 0.03010(7) 0.02509(6) 0.00196(7) 0.00163(7) 0.00323(7) 
N1 0.047(2) 0.0318(17) 0.0295(17) 0.0031(14) -0.0001(14) 0.0053(15) 
N2 0.047(2) 0.0396(19) 0.0281(17) 0.0033(14) 0.0043(15) 0.0048(16) 
N3 0.052(2) 0.0311(17) 0.0300(18) 0.0021(14) 0.0031(15) 0.0008(16) 
N4 0.055(2) 0.0383(19) 0.0229(16) 0.0000(14) 0.0005(14) 0.0026(17) 
C1 0.045(2) 0.034(2) 0.034(2) -0.0003(16) -0.0025(17) 0.0053(19) 
C2 0.063(3) 0.031(2) 0.042(2) 0.0035(18) 0.002(2) 0.007(2) 
C3 0.068(3) 0.037(2) 0.038(2) 0.0106(18) 0.005(2) 0.004(2) 
C4 0.050(2) 0.032(2) 0.033(2) 0.0066(16) 0.0044(18) 0.0005(19) 
C5 0.050(3) 0.045(2) 0.031(2) 0.0057(18) 0.0042(18) 0.005(2) 
C6 0.048(3) 0.042(2) 0.034(2) 0.0015(18) 0.0060(18) 0.001(2) 
C7 0.071(3) 0.053(3) 0.040(3) 0.001(2) 0.018(2) 0.014(3) 
C8 0.066(3) 0.047(3) 0.048(3) -0.002(2) 0.015(2) 0.014(2) 
C9 0.043(2) 0.038(2) 0.040(2) 0.0004(18) 0.0024(18) 0.0067(19) 
C10 0.050(3) 0.039(2) 0.041(3) 0.0001(19) -0.003(2) 0.009(2) 
C11 0.052(3) 0.030(2) 0.042(3) 0.0032(16) -0.0038(19) 0.003(2) 
C12 0.073(3) 0.033(2) 0.047(3) 0.0066(19) -0.005(2) 0.010(2) 
C13 0.079(3) 0.042(2) 0.032(2) 0.0107(18) -0.001(2) 0.002(2) 
C14 0.057(3) 0.037(2) 0.031(2) 0.0068(17) 0.0007(19) -0.001(2) 
C15 0.059(3) 0.042(2) 0.031(2) 0.0059(18) 0.0019(19) -0.003(2) 
C16 0.058(3) 0.038(2) 0.031(2) -0.0012(17) 0.0012(19) -0.002(2) 
C17 0.080(3) 0.051(3) 0.032(2) 0.001(2) 0.015(2) 0.007(3) 
C18 0.073(3) 0.045(3) 0.036(2) -0.008(2) 0.011(2) 0.006(2) 
C19 0.049(2) 0.033(2) 0.030(2) -0.0022(16) 0.0023(17) 0.0014(19) 
C20 0.045(2) 0.034(2) 0.038(2) -0.0052(18) -0.0033(19) 0.003(2) 
C21 0.062(3) 0.042(2) 0.034(2) 0.0050(19) 0.007(2) 0.007(2) 
C22 0.067(4) 0.117(5) 0.052(3) 0.027(3) 0.000(3) -0.023(4) 
C23 0.088(5) 0.121(6) 0.072(4) 0.033(4) 0.015(4) -0.033(4) 
C24 0.108(5) 0.064(3) 0.057(4) 0.013(3) 0.036(4) -0.002(3) 
C25 0.112(4) 0.064(3) 0.037(3) 0.009(3) -0.001(3) 0.025(3) 
C26 0.073(3) 0.060(3) 0.043(3) 0.000(2) 0.003(2) 0.005(3) 
C27 0.196(10) 0.108(6) 0.075(5) 0.041(5) 0.049(6) -0.002(6) 
C31 0.061(3) 0.049(3) 0.043(3) 0.000(2) -0.004(2) 0.023(3) 
C32 0.075(4) 0.044(3) 0.064(3) -0.002(2) 0.008(3) 0.009(3) 
C33 0.143(7) 0.044(3) 0.073(4) -0.002(3) 0.003(4) 0.010(4) 
C34 0.154(8) 0.064(4) 0.068(4) -0.017(3) -0.019(5) 0.055(5) 
C35 0.083(5) 0.120(6) 0.090(5) -0.015(5) -0.018(4) 0.059(5) 
C36 0.068(4) 0.071(4) 0.078(4) -0.008(3) -0.011(3) 0.019(3) 
C37 0.207(11) 0.088(6) 0.175(9) -0.042(6) -0.025(8) 0.092(7) 
C41 0.077(3) 0.043(2) 0.029(2) 0.0017(18) 0.007(2) -0.005(2) 
C42 0.079(4) 0.089(4) 0.057(4) 0.016(3) 0.009(3) 0.000(3) 
C43 0.099(5) 0.100(5) 0.086(5) 0.021(4) 0.044(4) -0.014(4) 
C44 0.150(7) 0.064(4) 0.045(4) 0.011(3) 0.038(4) 0.003(4) 
C45 0.143(6) 0.057(3) 0.026(2) 0.008(3) 0.003(3) 0.003(3) 
C46 0.094(4) 0.047(3) 0.037(3) 0.005(2) -0.004(3) -0.004(3) 
C47 0.217(11) 0.108(6) 0.096(6) 0.047(5) 0.077(7) -0.001(7) 
C51 0.046(2) 0.040(2) 0.031(2) -0.0017(17) -0.0035(18) 0.009(2) 
C52 0.057(3) 0.041(2) 0.046(3) -0.0049(19) -0.006(2) 0.007(2) 
C53 0.101(5) 0.049(3) 0.057(3) -0.008(2) -0.003(3) 0.011(3) 
C54 0.092(5) 0.071(4) 0.052(3) -0.021(3) -0.020(3) 0.041(4) 
C55 0.052(3) 0.105(5) 0.064(4) -0.027(3) -0.014(3) 0.037(4) 
C56 0.055(3) 0.069(3) 0.046(3) -0.018(2) -0.003(2) 0.004(3) 
C57 0.167(9) 0.107(6) 0.104(6) -0.022(5) -0.010(6) 0.086(6) 
C61 0.045(2) 0.032(2) 0.031(2) 0.0050(16) -0.0002(17) 0.0075(18) 
C62 0.049(3) 0.057(3) 0.032(2) 0.002(2) 0.0039(19) -0.001(2) 
C63 0.058(3) 0.063(3) 0.026(2) -0.002(2) 0.0007(19) -0.002(2) 
C64 0.045(2) 0.048(3) 0.038(2) -0.0011(19) -0.0031(19) 0.000(2) 
C65 0.056(3) 0.069(3) 0.037(3) 0.003(2) 0.006(2) -0.010(3) 
C66 0.057(3) 0.058(2) 0.026(2) -0.003(2) 0.002(2) -0.007(2) 
C67 0.052(3) 0.101(5) 0.056(3) 0.001(3) 0.004(3) -0.020(3) 
C71 0.299(15) 0.41(2) 0.208(14) 0.220(15) -0.185(12) -0.298(16) 
O1 0.053(2) 0.091(3) 0.0405(18) -0.0048(17) -0.0027(15) -0.0149(19) 
O2 0.064(2) 0.062(2) 0.0436(18) 0.0060(16) -0.0130(16) -0.0160(18) 
  
_geom_special_details 
; 
 All esds (except the esd in the dihedral angle between two l.s. planes) 
 are estimated using the full covariance matrix.  The cell esds are taken 
 into account individually in the estimation of esds in distances, angles 
 and torsion angles; correlations between esds in cell parameters are only 
 used when they are defined by crystal symmetry.  An approximate (isotropic) 
 treatment of cell esds is used for estimating esds involving l.s. planes. 
; 
  
loop_ 
 _geom_bond_atom_site_label_1 
 _geom_bond_atom_site_label_2 
 _geom_bond_distance 
 _geom_bond_site_symmetry_2 
 _geom_bond_publ_flag 
Ir1 C61 2.023(4) . ? 
Ir1 N1 2.027(3) . ? 
Ir1 N3 2.031(3) . ? 
Ir1 N2 2.031(3) . ? 
Ir1 N4 2.043(3) . ? 
N1 C1 1.379(5) . ? 
N1 C4 1.389(5) . ? 
N2 C6 1.373(5) . ? 
N2 C9 1.375(5) . ? 
N3 C11 1.375(6) . ? 
N3 C14 1.376(5) . ? 
N4 C16 1.370(5) . ? 
N4 C19 1.385(5) . ? 
C1 C20 1.378(6) . ? 
C1 C2 1.447(6) . ? 
C2 C3 1.335(6) . ? 
C3 C4 1.428(6) . ? 
C4 C5 1.394(6) . ? 
C5 C6 1.396(6) . ? 
C5 C21 1.499(6) . ? 
C6 C7 1.444(6) . ? 
C7 C8 1.343(7) . ? 
C8 C9 1.445(6) . ? 
C9 C10 1.384(6) . ? 
C10 C11 1.387(6) . ? 
C10 C31 1.499(6) . ? 
C11 C12 1.442(6) . ? 
C12 C13 1.332(7) . ? 
C13 C14 1.441(6) . ? 
C14 C15 1.384(6) . ? 
C15 C16 1.397(6) . ? 
C15 C41 1.515(6) . ? 
C16 C17 1.433(6) . ? 
C17 C18 1.337(7) . ? 
C18 C19 1.436(6) . ? 
C19 C20 1.393(6) . ? 
C20 C51 1.498(6) . ? 
C21 C22 1.359(7) . ? 
C21 C26 1.388(7) . ? 
C22 C23 1.387(8) . ? 
C23 C24 1.353(9) . ? 
C24 C25 1.361(8) . ? 
C24 C27 1.525(8) . ? 
C25 C26 1.392(8) . ? 
C31 C36 1.366(8) . ? 
C31 C32 1.374(7) . ? 
C32 C33 1.358(8) . ? 
C33 C34 1.379(11) . ? 
C34 C35 1.383(11) . ? 
C34 C37 1.525(8) . ? 
C35 C36 1.370(9) . ? 
C41 C42 1.367(8) . ? 
C41 C46 1.381(7) . ? 
C42 C43 1.391(8) . ? 
C43 C44 1.373(11) . ? 
C44 C45 1.361(10) . ? 
C44 C47 1.516(8) . ? 
C45 C46 1.395(7) . ? 
C51 C56 1.379(7) . ? 
C51 C52 1.389(6) . ? 
C52 C53 1.384(7) . ? 
C53 C54 1.376(9) . ? 
C54 C55 1.357(9) . ? 
C54 C57 1.514(8) . ? 
C55 C56 1.378(7) . ? 
C61 C66 1.384(6) . ? 
C61 C62 1.404(6) . ? 
C62 C63 1.402(7) . ? 
C63 C64 1.365(6) . ? 
C64 C65 1.380(6) . ? 
C64 O1 1.381(5) . ? 
C65 C66 1.398(7) . ? 
C67 O1 1.431(6) . ? 
C71 O2 1.304(9) . ? 
  
loop_ 
 _geom_angle_atom_site_label_1 
 _geom_angle_atom_site_label_2 
 _geom_angle_atom_site_label_3 
 _geom_angle 
 _geom_angle_site_symmetry_1 
 _geom_angle_site_symmetry_3 
 _geom_angle_publ_flag 
C61 Ir1 N1 91.33(15) . . ? 
C61 Ir1 N3 91.56(15) . . ? 
N1 Ir1 N3 177.07(15) . . ? 
C61 Ir1 N2 91.44(15) . . ? 
N1 Ir1 N2 90.36(13) . . ? 
N3 Ir1 N2 90.02(13) . . ? 
C61 Ir1 N4 92.05(15) . . ? 
N1 Ir1 N4 89.78(13) . . ? 
N3 Ir1 N4 89.66(13) . . ? 
N2 Ir1 N4 176.51(14) . . ? 
C1 N1 C4 107.2(3) . . ? 
C1 N1 Ir1 126.5(3) . . ? 
C4 N1 Ir1 126.2(3) . . ? 
C6 N2 C9 107.2(3) . . ? 
C6 N2 Ir1 126.5(3) . . ? 
C9 N2 Ir1 126.1(3) . . ? 
C11 N3 C14 107.2(3) . . ? 
C11 N3 Ir1 126.1(3) . . ? 
C14 N3 Ir1 126.7(3) . . ? 
C16 N4 C19 107.0(3) . . ? 
C16 N4 Ir1 126.9(3) . . ? 
C19 N4 Ir1 126.1(3) . . ? 
C20 C1 N1 126.6(4) . . ? 
C20 C1 C2 125.6(4) . . ? 
N1 C1 C2 107.7(4) . . ? 
C3 C2 C1 108.5(4) . . ? 
C2 C3 C4 107.6(4) . . ? 
N1 C4 C5 125.8(4) . . ? 
N1 C4 C3 108.9(4) . . ? 
C5 C4 C3 125.3(4) . . ? 
C4 C5 C6 124.9(4) . . ? 
C4 C5 C21 117.2(4) . . ? 
C6 C5 C21 117.9(4) . . ? 
N2 C6 C5 126.1(4) . . ? 
N2 C6 C7 109.2(4) . . ? 
C5 C6 C7 124.6(4) . . ? 
C8 C7 C6 107.1(4) . . ? 
C7 C8 C9 107.9(4) . . ? 
N2 C9 C10 126.1(4) . . ? 
N2 C9 C8 108.6(4) . . ? 
C10 C9 C8 125.3(4) . . ? 
C9 C10 C11 124.9(4) . . ? 
C9 C10 C31 118.7(4) . . ? 
C11 C10 C31 116.3(4) . . ? 
N3 C11 C10 126.3(4) . . ? 
N3 C11 C12 108.6(4) . . ? 
C10 C11 C12 125.2(4) . . ? 
C13 C12 C11 107.8(4) . . ? 
C12 C13 C14 107.8(4) . . ? 
N3 C14 C15 126.0(4) . . ? 
N3 C14 C13 108.6(4) . . ? 
C15 C14 C13 125.4(4) . . ? 
C14 C15 C16 125.4(4) . . ? 
C14 C15 C41 116.7(4) . . ? 
C16 C15 C41 117.9(4) . . ? 
N4 C16 C15 125.3(4) . . ? 
N4 C16 C17 108.8(4) . . ? 
C15 C16 C17 125.9(4) . . ? 
C18 C17 C16 108.1(4) . . ? 
C17 C18 C19 107.6(4) . . ? 
N4 C19 C20 126.1(4) . . ? 
N4 C19 C18 108.5(4) . . ? 
C20 C19 C18 125.4(4) . . ? 
C1 C20 C19 124.6(4) . . ? 
C1 C20 C51 117.3(4) . . ? 
C19 C20 C51 118.1(4) . . ? 
C22 C21 C26 117.7(5) . . ? 
C22 C21 C5 121.4(4) . . ? 
C26 C21 C5 120.8(4) . . ? 
C21 C22 C23 121.5(6) . . ? 
C24 C23 C22 121.4(6) . . ? 
C23 C24 C25 117.4(5) . . ? 
C23 C24 C27 122.4(7) . . ? 
C25 C24 C27 120.1(7) . . ? 
C24 C25 C26 122.3(6) . . ? 
C21 C26 C25 119.4(5) . . ? 
C36 C31 C32 118.5(5) . . ? 
C36 C31 C10 120.7(5) . . ? 
C32 C31 C10 120.7(5) . . ? 
C33 C32 C31 120.6(6) . . ? 
C32 C33 C34 121.3(7) . . ? 
C33 C34 C35 118.0(6) . . ? 
C33 C34 C37 122.3(8) . . ? 
C35 C34 C37 119.7(9) . . ? 
C36 C35 C34 120.1(7) . . ? 
C31 C36 C35 121.3(7) . . ? 
C42 C41 C46 118.9(5) . . ? 
C42 C41 C15 119.6(5) . . ? 
C46 C41 C15 121.4(5) . . ? 
C41 C42 C43 120.0(6) . . ? 
C44 C43 C42 121.7(7) . . ? 
C45 C44 C43 117.7(6) . . ? 
C45 C44 C47 120.9(8) . . ? 
C43 C44 C47 121.4(8) . . ? 
C44 C45 C46 121.6(6) . . ? 
C41 C46 C45 120.0(6) . . ? 
C56 C51 C52 117.6(4) . . ? 
C56 C51 C20 121.6(4) . . ? 
C52 C51 C20 120.8(4) . . ? 
C53 C52 C51 120.7(5) . . ? 
C54 C53 C52 121.3(5) . . ? 
C55 C54 C53 117.4(5) . . ? 
C55 C54 C57 121.5(7) . . ? 
C53 C54 C57 121.1(7) . . ? 
C54 C55 C56 122.6(6) . . ? 
C55 C56 C51 120.4(6) . . ? 
C66 C61 C62 116.0(4) . . ? 
C66 C61 Ir1 122.7(3) . . ? 
C62 C61 Ir1 121.3(3) . . ? 
C63 C62 C61 121.5(4) . . ? 
C64 C63 C62 120.5(4) . . ? 
C63 C64 C65 119.6(4) . . ? 
C63 C64 O1 116.2(4) . . ? 
C65 C64 O1 124.1(4) . . ? 
C64 C65 C66 119.6(5) . . ? 
C61 C66 C65 122.8(4) . . ? 
C64 O1 C67 117.1(4) . . ? 
  
_diffrn_measured_fraction_theta_max    1.000 
_diffrn_reflns_theta_full              28.03 
_diffrn_measured_fraction_theta_full   1.000 
_refine_diff_density_max    1.272 
_refine_diff_density_min   -0.570 
_refine_diff_density_rms    0.075 
  
